# Supplementary material
Source: publisher figshare collection journal article supplement (https://frontiersin.figshare.com/ndownloader/files/25874586)

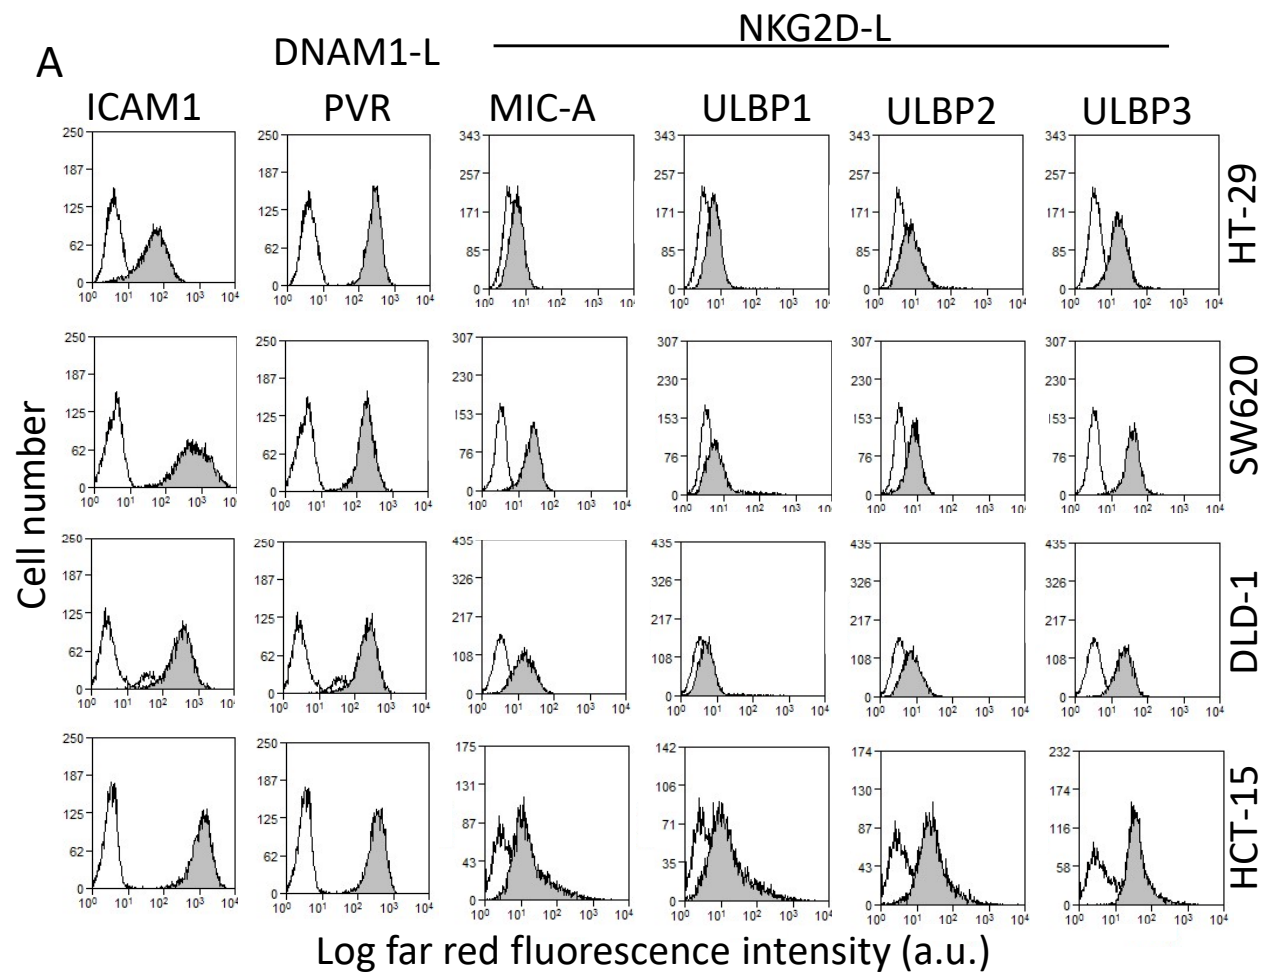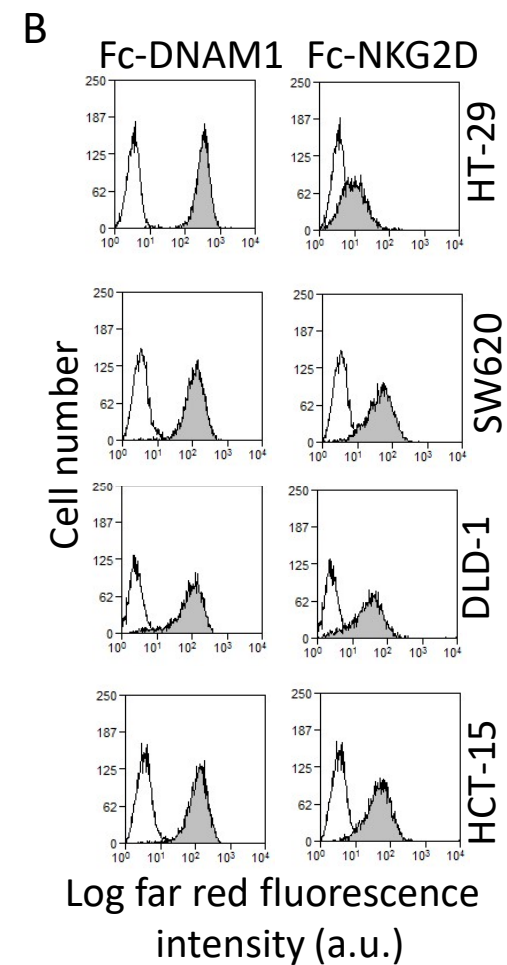

Supplement: Supplementary file 1 [file 25874586]

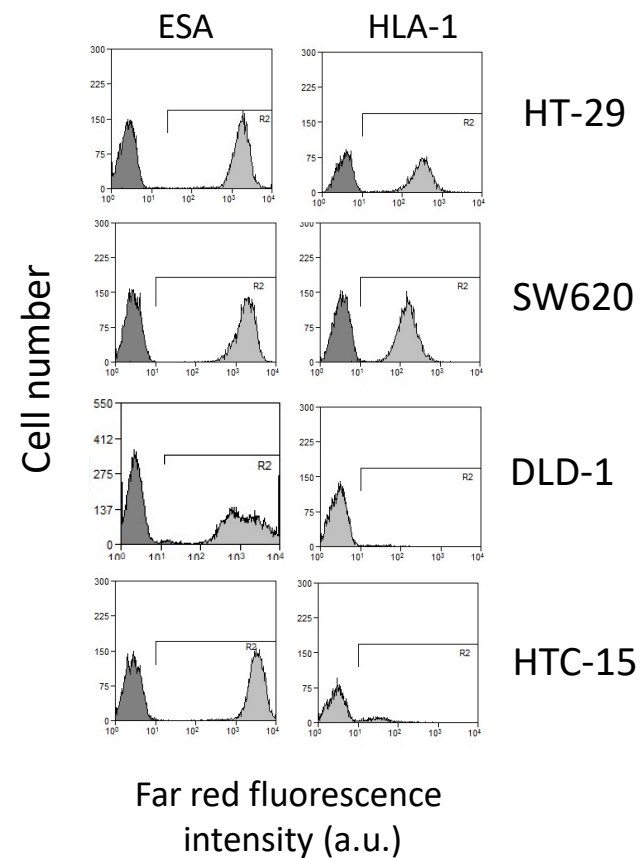

Supplement: Supplementary file 2 [file 25874586]

A

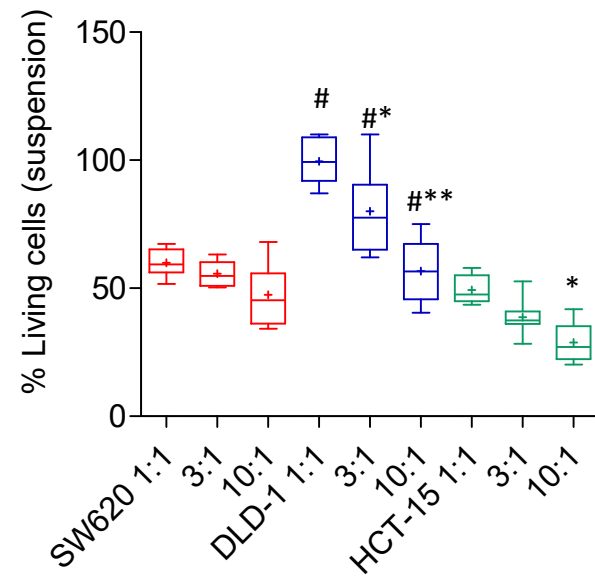

B

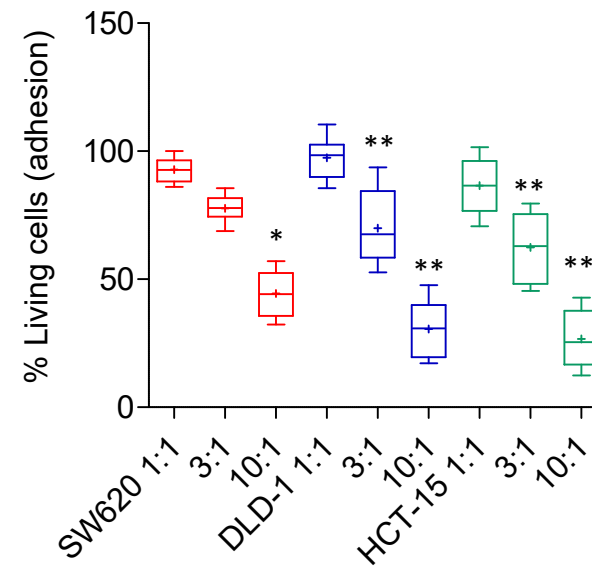

Supplement: Supplementary file 3 [file 25874586]

# A ROI identification

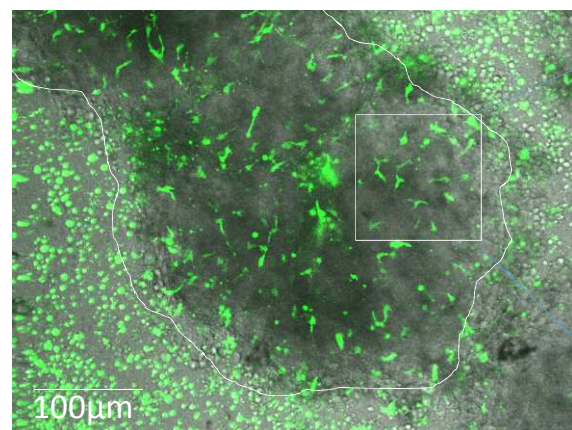

# Zoom ROI

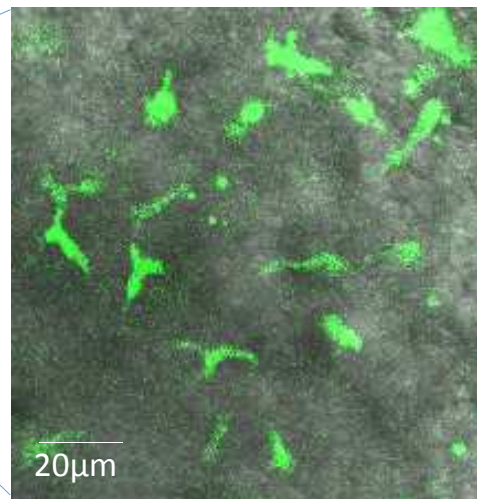

# Zoom ROI cell count

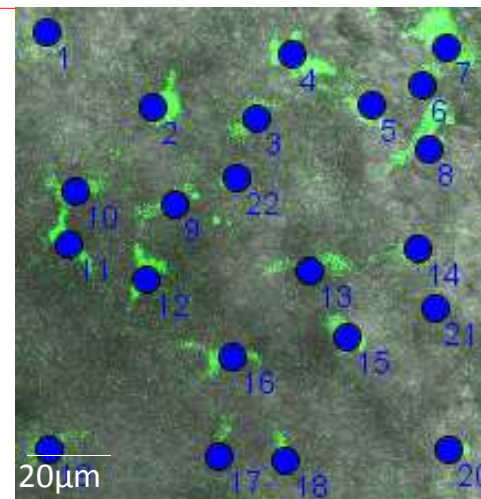

# B

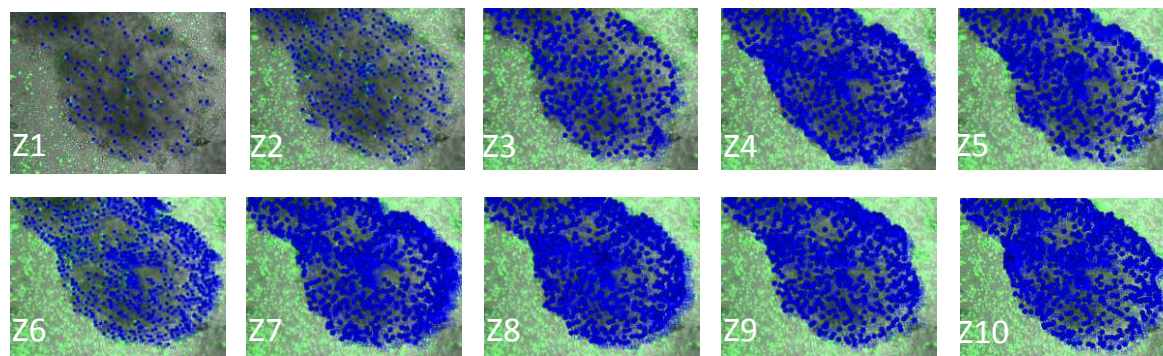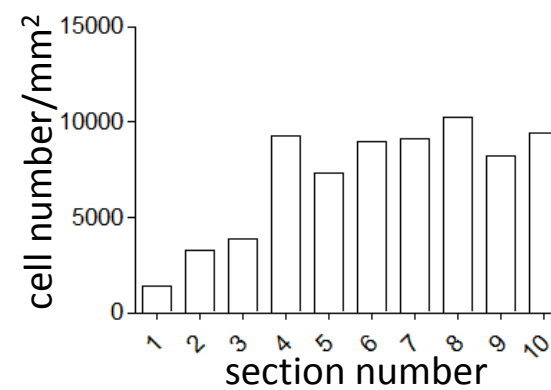

Supplement: Supplementary file 4 [file 25874586]

A

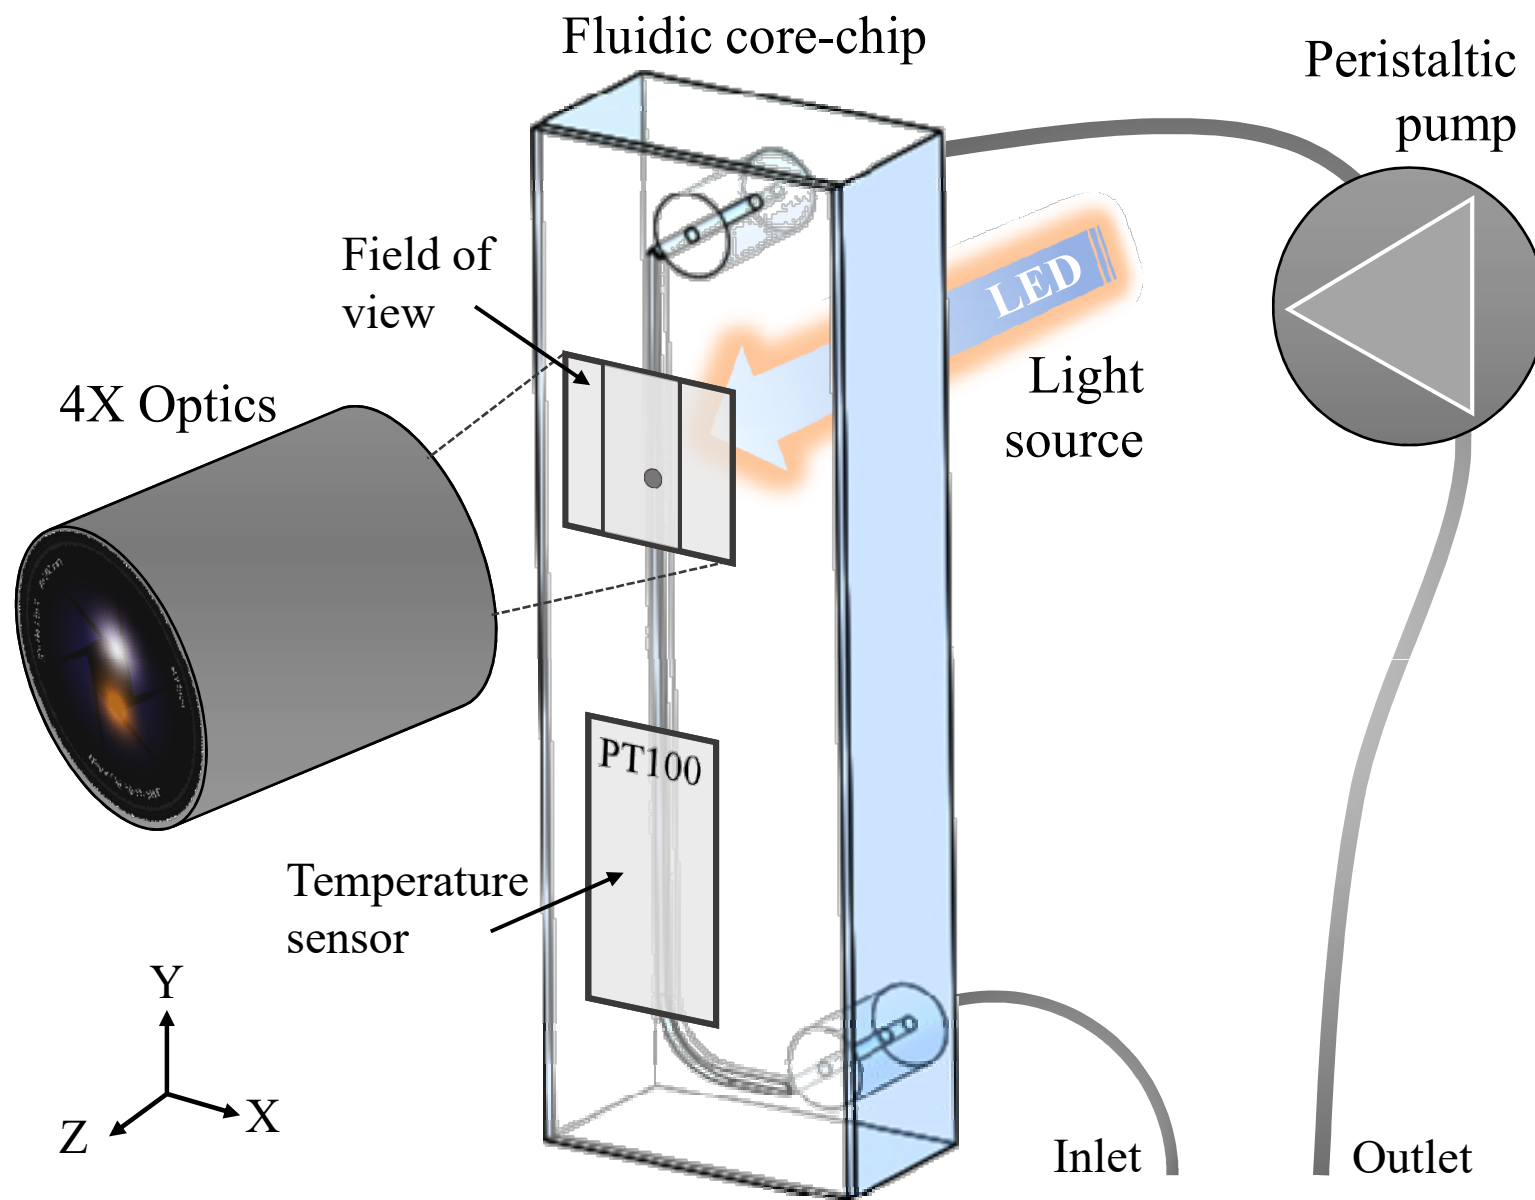

B

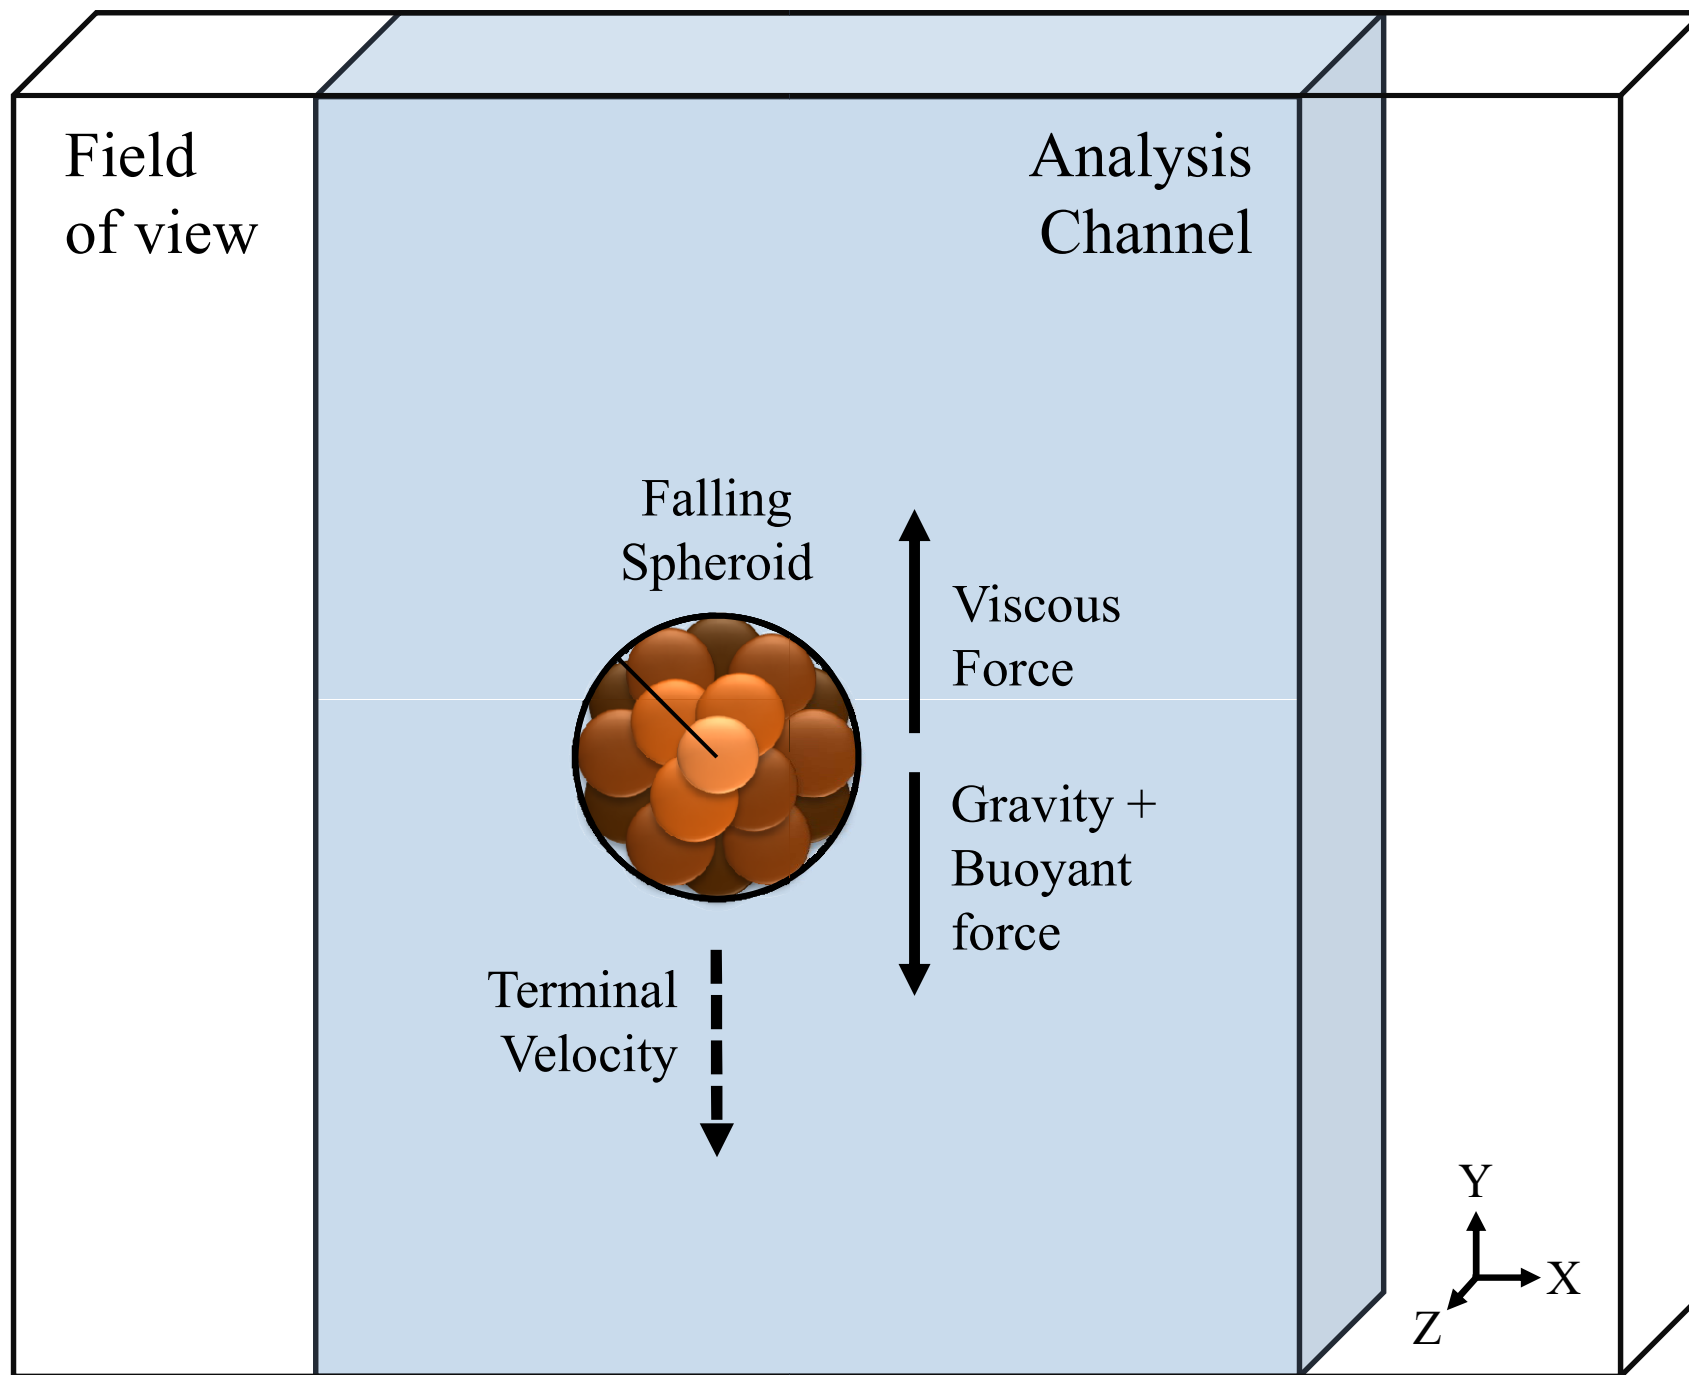

Supplement: Supplementary file 5 [file 25874586]
